# Supplementary material for: Immunogenetic Predisposition to SARS-CoV-2 Infection
Source: MDPI journal article supplement (doi:10.3390/biology12010037), 2022-12-25

# Immunogenetic predisposition to SARS-CoV-2 infection

Claudia Lehmann, Henry Loeffler-Wirth, Vera Balz, Juergen Enzmann, Ramona Landgraf, Nicole Lakowa, Thomas Gruenewald, Johannes C. Fischer and Ilias Doxiadis

## Supplementary Materials

**Table S1.** Characteristics of primers used in the NGS test system. Numbering is referenced to Genome build GRCh37.1 / hg19.

| Blood Group Analysis |        |                  |            |                          |                    |
|----------------------|--------|------------------|------------|--------------------------|--------------------|
| Blood Group System   | Gene   | Target           | Chromosome | Amplified Region         | Amplicon Size (bp) |
| ABO                  | ABO    | Exon 1           | 9          | 136,150,360..136,150,792 | 433                |
|                      |        | Exon 2           |            | 136,137,169..136,137,640 | 473                |
|                      |        | Exon 3           |            | 136,136,687..136,137,164 | 478                |
|                      |        | Exon 4           |            | 136,135,052..136,135,503 | 452                |
|                      |        | Exon 5           |            | 136,133,318..136,133,692 | 375                |
|                      |        | Exon 6           |            | 136,132,640..136,133,028 | 389                |
|                      |        | Exon 7 (5'-part) |            | 136,131,265..136,131,768 | 504                |
|                      |        | Exon 7 (3'-part) |            | 136,130,907..136,131,370 | 464                |
| MNS                  | GYPA   | Exon 2           | 4          | 145,041,554..145,041,915 | 371                |
|                      |        | Exon 3           |            | 145,040,595..145,040,984 | 389                |
|                      |        | Exon 4           |            | 145,039,569..145,040,051 | 482                |
|                      |        | Exon 5           |            | 145,037,862..145,038,303 | 441                |
|                      | GYPB   | Exon 2           |            | 144,922,248..144,922,611 | 363                |
|                      |        | Exon 3           |            | 144,921,292..144,921,678 | 386                |
|                      |        | Exon 4           |            | 144,920,260..144,920,748 | 488                |
|                      |        | Exon 5           |            | 144,918,548..144,918,989 | 441                |
|                      | GYPE   | Exon 2           |            | 144,801,474..144,801,836 | 363                |
|                      |        | Exon 3           |            | 144,800,519..144,800,905 | 387                |
|                      |        | Exon 4           |            | 144,799,488..144,799,974 | 487                |
|                      |        | Exon 5           |            | 144,918,548..144,918,989 | 442                |
| P1PK                 | A4GALT | Promoter         | 22         | 43,113,665..43,114,050   | 386                |
|                      |        | Exon 3           |            | 43,089,693..43,090,192   | 500                |
| RH                   | RHCE   | Exon 1           | 1          | 25,747,087..25,747,462   | 375                |
|                      |        | Exon 2           |            | 25,734,981..25,735,422   | 441                |
|                      |        | Exon 3           |            | 25,728,976..25,729,399   | 423                |
|                      |        | Exon 4           |            | 25,718,433..25,718,818   | 385                |
|                      |        | Exon 5           |            | 25,714,146..25,714,461   | 315                |
|                      |        | Exon 6           |            | 25,715,409..25,715,772   | 363                |

|     |                |                      |    |                          |     |
|-----|----------------|----------------------|----|--------------------------|-----|
|     | <i>RHD</i>     | Exon 7               |    | 25,712,081..25,712,376   | 295 |
|     |                | Exon 8               |    | 25,701,673..25,702,183   | 510 |
|     |                | Exon 9               |    | 25,696,742..25,697,196   | 454 |
|     |                | Exon 10              |    | 25,688,873..25,689,316   | 444 |
|     |                | Exon 1               |    | 25,598,854..25,599,229   | 376 |
|     |                | Exon 2               |    | 25,611,002..25,611,442   | 414 |
|     |                | Exon 3               |    | 25,616,959..25,617,393   | 435 |
|     |                | Exon 4               |    | 25,627,252..25,627,636   | 385 |
|     |                | Exon 5               |    | 25,627,956..25,628,271   | 316 |
|     |                | Exon 6               |    | 25,629,645..25,630,027   | 383 |
| LU  | <i>BCAM</i>    | Exon 7               | 19 | 25,633,046..25,633,341   | 296 |
|     |                | Exon 8               |    | 25,643,227..25,643,737   | 511 |
|     |                | Exon 9               |    | 25,648,217..25,648,669   | 453 |
|     |                | Exon 10              |    | 25,655,117..25,655,557   | 441 |
|     |                | Exon 3 + 4           |    | 45,315,383..45,315,826   | 444 |
|     |                | Exon 5 + 6           |    | 45,316,448..45,316,929   | 482 |
|     |                | Exon 9 + 10          |    | 45,321,712..45,322,205   | 494 |
|     |                | Exon 11              |    | 45,322,159..45,322,646   | 488 |
|     |                | Exon 12 + 13         |    | 45,322,549..45,323,036   | 488 |
|     |                | Exon 14              |    | 45,323,885..45,324,210   | 326 |
| KEL | <i>KEL</i>     | Exon 6               | 7  | 142,654,699..142,655,136 | 438 |
|     |                | Exon 7 + 8           |    | 142,651,220..142,651,653 | 434 |
|     |                | Exon 13              |    | 142,641,163..142,641,657 | 495 |
|     |                | Exon 15 + 16         |    | 142,640,296..142,640,789 | 494 |
|     |                | Exon 17              |    | 142,639,813..142,640,248 | 436 |
|     |                | Exon 18              |    | 142,639,298..142,639,705 | 408 |
|     |                | Exon 19              |    | 142,638,042..142,638,536 | 495 |
| LE  | <i>FUT3</i>    | Exon 3 (5'-part)     | 19 | 5,844,506..5,844,994     | 489 |
|     |                | Exon 3 (center part) |    | 5,844,091..5,844,582     | 492 |
|     |                | Exon 3 (3'-part)     |    | 5,843,719..5,844,208     | 490 |
| FY  | <i>ACKR1</i>   | 5'-UTR + Exon 1      | 1  | 159,174,621..159,175,080 | 460 |
|     |                | Exon 2 (5'-part)     |    | 159,175,132..159,175,623 | 492 |
|     |                | Exon 2 (center part) |    | 159,175,557..159,176,044 | 488 |
|     |                | Exon 2 (3'-part)     |    | 159,175,842..159,176,329 | 488 |
| JK  | <i>SLC14A1</i> | Exon 3               | 18 | 43,310,204..43,310,640   | 437 |
|     |                | Exon 4               |    | 43,310,772..43,311,228   | 457 |
|     |                | Exon 5               |    | 43,314,188..43,314,568   | 381 |
|     |                | Exon 6               |    | 43,316,359..43,316,727   | 369 |
|     |                | Exon 7               |    | 43,318,864..43,319,352   | 489 |
|     |                | Exon 8               |    | 43,319,333..43,319,793   | 461 |
|     |                | Exon 9               |    | 43,328,196..43,328,591   | 396 |

|      |         |                      |    |                          |     |
|------|---------|----------------------|----|--------------------------|-----|
|      |         | Exon 10              |    | 43,329,608..43,329,971   | 364 |
| DI   | SLC4A1  | Exon 16              | 17 | 42,331,735..42,332,220   | 486 |
|      |         | Exon 18 + 19         |    | 42,328,399..42,328,870   | 472 |
| YT   | ACHE    | Exon 2 (3'-part)     | 7  | 100,490,697..100,491,187 | 491 |
| DO   | ART4    | Exon 2 (5'-part)     | 12 | 14,993,734..14,994,149   | 416 |
|      |         | Exon 2 (3'-part)     |    | 14,993,335..14,993,806   | 472 |
| CO   | AQP1    | Exon 1 (5'-part)     | 7  | 30,951,346..30,951,811   | 466 |
|      |         | Exon 1 (3'-part)     |    | 30,951,599..30,952,042   | 444 |
| H    | FUT1    | Exon 4 (5'-part)     | 19 | 49,254,122..49,254,606   | 485 |
|      |         | Exon 4 (center part) |    | 49,253,825..49,254,310   | 486 |
|      |         | Exon 4 (3'-part)     |    | 49,253,386..49,253,878   | 493 |
|      | FUT2    | Exon 2 (5'-part)     | 19 | 49,206,121..49,206,613   | 493 |
|      |         | Exon 2 (center part) |    | 49,206,496..49,206,968   | 473 |
|      |         | Exon 2 (3'-part)     |    | 49,206,911..49,207,379   | 469 |
| GE   | GYPC    | Exon 2               | 2  | 127,447,552..127,447,948 | 397 |
|      |         | Exon 3               |    | 127,451,277..127,451,740 | 464 |
| CROM | CD55    | Exon 2               | 1  | 207,495,575..207,496,056 | 482 |
|      |         | Exon 6               |    | 207,504,312..207,504,807 | 496 |
| KN   | CR1     | Exon 26              | 1  | 207,760,472..207,760,944 | 473 |
|      |         | Exon 29              |    | 207,782,603..207,783,071 | 469 |
| IN   | CD44    | Exon 2               | 11 | 35,198,016..35,198,509   | 494 |
| JR   | ABCG2   | Exon 2               | 4  | 89,060,870..89,061,363   | 494 |
|      |         | Exon 4               |    | 89,052,838..89,053,229   | 392 |
|      |         | Exon 5               |    | 89,052,155..89,052,628   | 474 |
|      |         | Exon 7               |    | 89,039,032..89,039,525   | 494 |
|      |         | Exon 9               |    | 89,034,316..89,034,792   | 477 |
|      |         | Exon 13              |    | 89,018,491..89,018,904   | 414 |
| LAN  | ABCB6   | Exon 16              | 2  | 89,013,275..89,013,636   | 362 |
|      |         | Exon 3               |    | 220,081,281..220,081,759 | 479 |
|      |         | Exon 5               |    | 220,080,686..220,081,079 | 394 |
|      |         | Exon 6               |    | 220,079,574..220,079,951 | 378 |
|      |         | Exon 7               |    | 220,079,072..220,079,541 | 470 |
|      |         | Exon 9               |    | 220,078,441..220,078,835 | 395 |
| VEL  | SMIM1   | Exon 10 + 11         | 1  | 220,078,110..220,078,485 | 376 |
|      |         | Exon 12 + 13         |    | 220,077,671..220,078,160 | 490 |
| AT   | SLC29A1 | Exon 3               | 6  | 3,691,784..3,692,199     | 416 |
|      |         | Exon 4               |    | 3,692,346..3,692,722     | 377 |
| AT   | SLC29A1 | Exon 6               | 6  | 44,197,953..44,198,428   | 476 |
|      |         | Exon 12              |    | 44,200,392..44,200,878   | 487 |

| Platelet Antigen Analysis |         |            |                        |                    |
|---------------------------|---------|------------|------------------------|--------------------|
| Gene                      | Target  | Chromosome | Amplified Region       | Amplicon Size (bp) |
| <i>ITGB3</i>              | Exon 3  | 17         | 45,360,632..45,361,068 | 437                |
|                           | Exon 4  |            | 45,361,730..45,362,156 | 427                |
| <i>GP1BA</i>              | Exon 2  | 17         | 4,836,200..4,836,693   | 494                |
| <i>ITG2A</i>              | Exon 13 | 5          | 52,358,675..52,358,987 | 313                |
| <i>ITBA2B</i>             | Exon 22 | 17         | 42,452,639..42,453,109 | 471                |
| <i>CD109</i>              | Exon 19 | 6          | 74,493,384..74,493,817 | 434                |

#### Summarized Alleles

In addition, for blood group genes for which not the entire transcript is analyzed, we introduced the term “eGroup”, e.g. the genotyping results carry an “E001 to E004”-tag. Here, similar to the G-group definition previously known for molecular genotyping results for Human Leukocyte Antigens (HLA), all alleles are summarized which share identical genomic sequence for all analyzed parts.

**Table S2:** Nomenclature of non-referenced alleles

Example 1:

| BG-System<br>or gene <sup>1</sup> | Divider 1 <sup>2</sup> | Most similar<br>ISBT allele <sup>3</sup> | Divider 2 <sup>4</sup> | Amino acid<br>change <sup>5</sup> | Divider 3 <sup>6</sup> | Nucleotide<br>change <sup>7</sup> |
|-----------------------------------|------------------------|------------------------------------------|------------------------|-----------------------------------|------------------------|-----------------------------------|
| DO                                | *                      | 01                                       | .                      | D86H                              | _                      | 378C_T                            |

Example 2:

| BG-System<br>or gene <sup>1</sup> | Divider 1 <sup>2</sup> | Most similar<br>ISBT allele <sup>3</sup> | Divider 2 <sup>4</sup> | Nucleotide<br>change <sup>7</sup> |
|-----------------------------------|------------------------|------------------------------------------|------------------------|-----------------------------------|
| ABO                               | *                      | A1.01                                    | .                      | E3-10C_T                          |

Example 3:

| BG-System<br>or gene <sup>1</sup> | Divider<br>1 <sup>2</sup> | Most similar<br>ISBT allele <sup>3</sup> | Divider 2 <sup>4</sup> | Pseudoexon <sup>8</sup> | Divider 4 <sup>9</sup> | Nucleotide<br>change <sup>7</sup> |
|-----------------------------------|---------------------------|------------------------------------------|------------------------|-------------------------|------------------------|-----------------------------------|
| GYPB                              | *                         | 04                                       | .                      | E3                      | .                      | 41T_C                             |

<sup>1</sup> Depending on the ISBT nomenclature the BG-system name or the gene name is used.<sup>2</sup> Divider 1 ("") indicates a result that was obtained using molecular typing methods.<sup>3</sup> The most similar ISBT allele as published by the ISBT working parties (<http://www.isbtweb.org/working-parties/red-cell-immunogenetics-and-blood-group-terminology/>).<sup>4</sup> Divider 2 is always a ".". It indicates that additional amino acid changes or nucleotide changes are present.<sup>5</sup> Amino acid changes are listed in consecutive order. They are termed in one-letter-code with the position of amino acid in the middle.<sup>6</sup> Divider 3 "\_" is used to separate additional amino acid changes or nucleotide changes in the cDNA or changes which are present in intron.<sup>7</sup> Nucleotide changes, which do not result in an amino acid change are termed as nucleotide position in cDNA immediately followed by wild type nucleotide and changed nucleotide separated by "\_". In case of changes in intron regions, the nearest exon is given followed by distance to the exon in counts of nucleotide.

+, Nucleotide change is downstream of exon.

-, Nucleotide change is upstream of exon.

<sup>8</sup> Divider 4 "." indicates that the following nucleotide change is present in a pseudoexon (valid for GYPB and GYPE, only).

**Figure S1:** Frequencies of classical HLA loci in the Saxonian population. The results are depicted in the highest to lower number of individuals per allele.

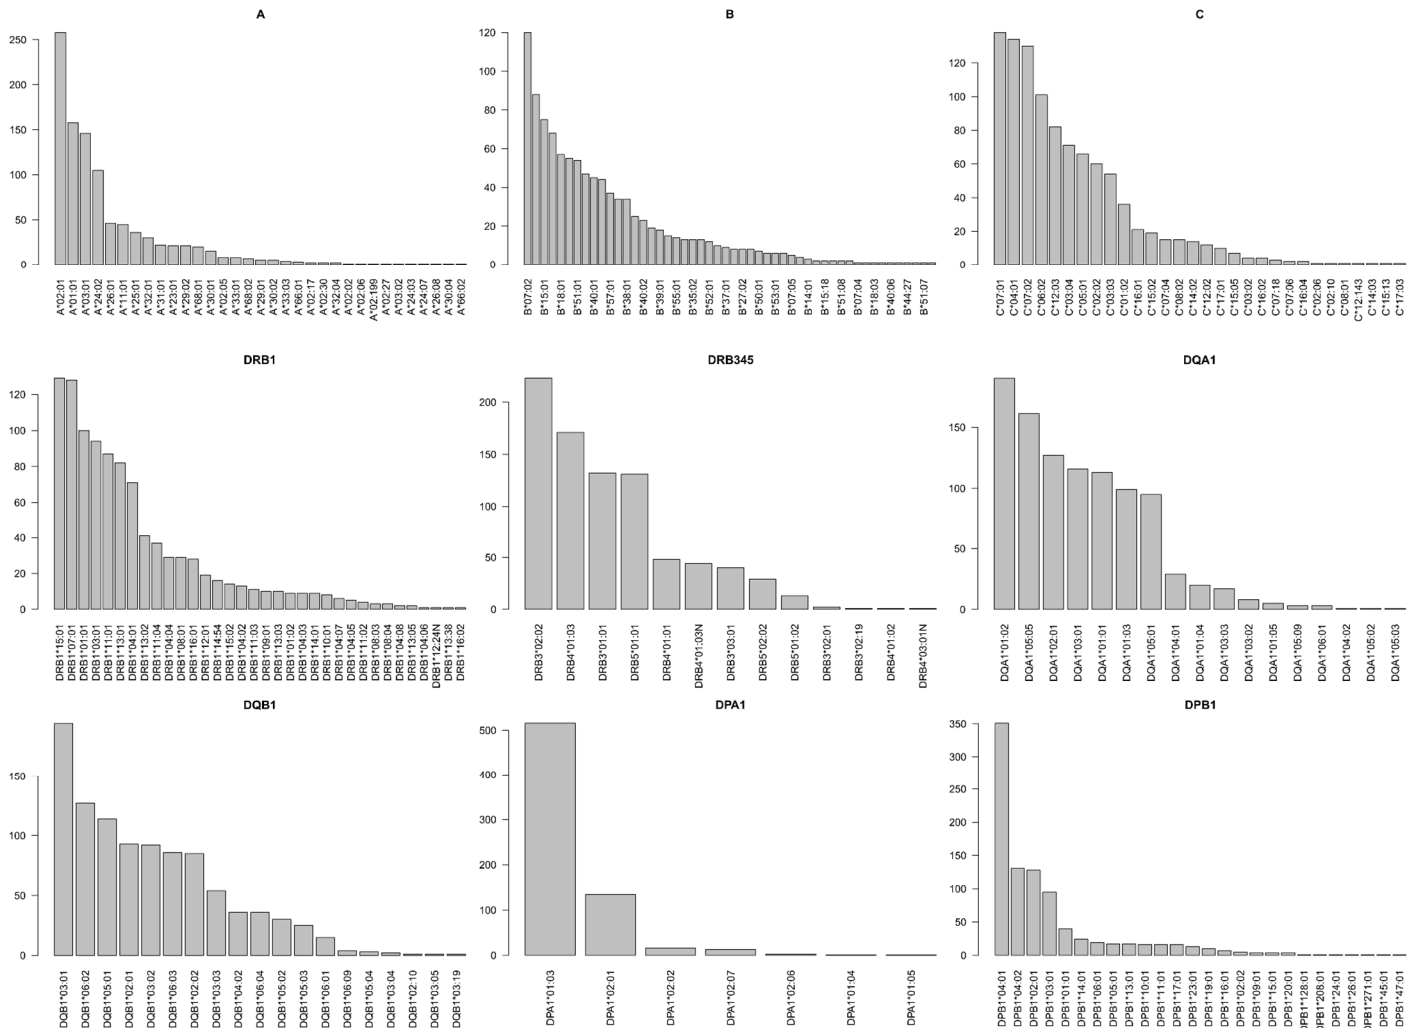

**Figure S2:** Frequencies of non-classical HLA loci in the Saxonian population, defined in 134 unrelated individuals of the present study. No selection was done. The results are depicted in the highest to lower number of individuals per allele.

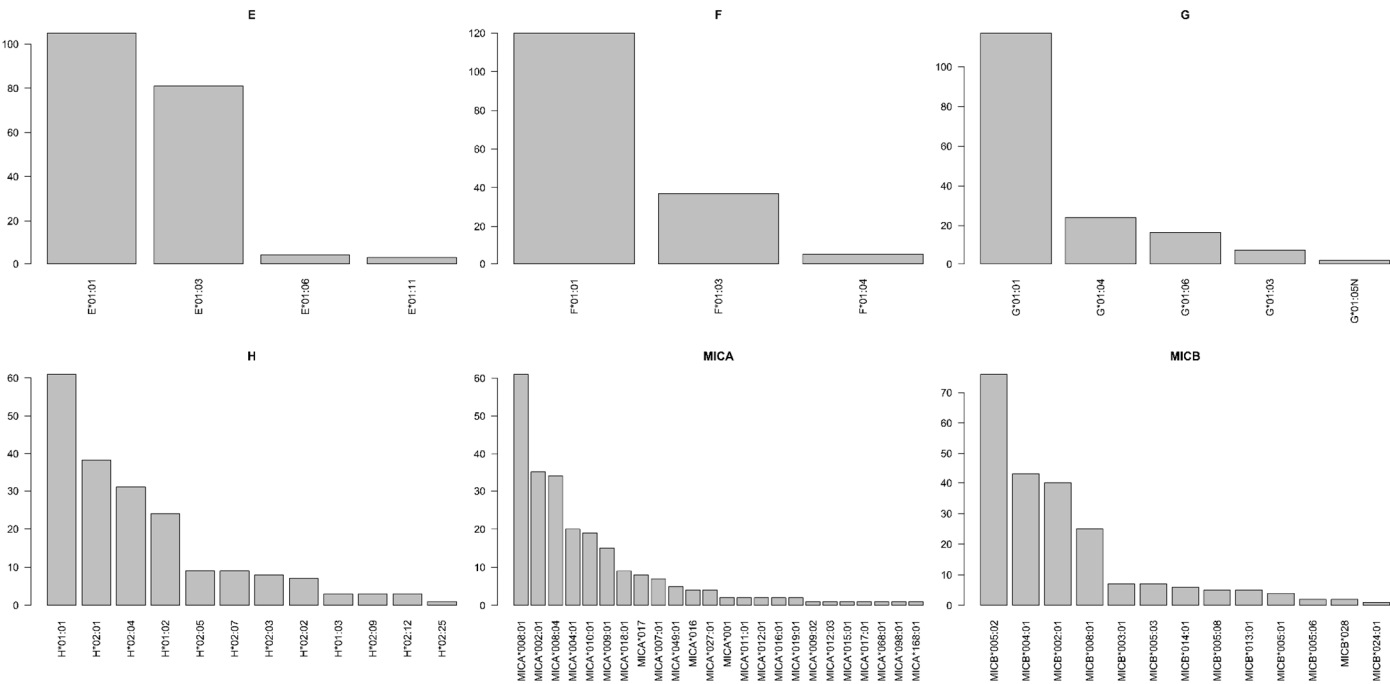

**Figure S3:** Evaluation of HLA class II alleles within the groups of PCR positive and PCR negative individuals. t-statistics of positive PCR proportion against the overall positive rate provides p-values, which were corrected for multiple testing using the Bonferroni method. The horizontal line indicates a corrected p-value of 0.05.

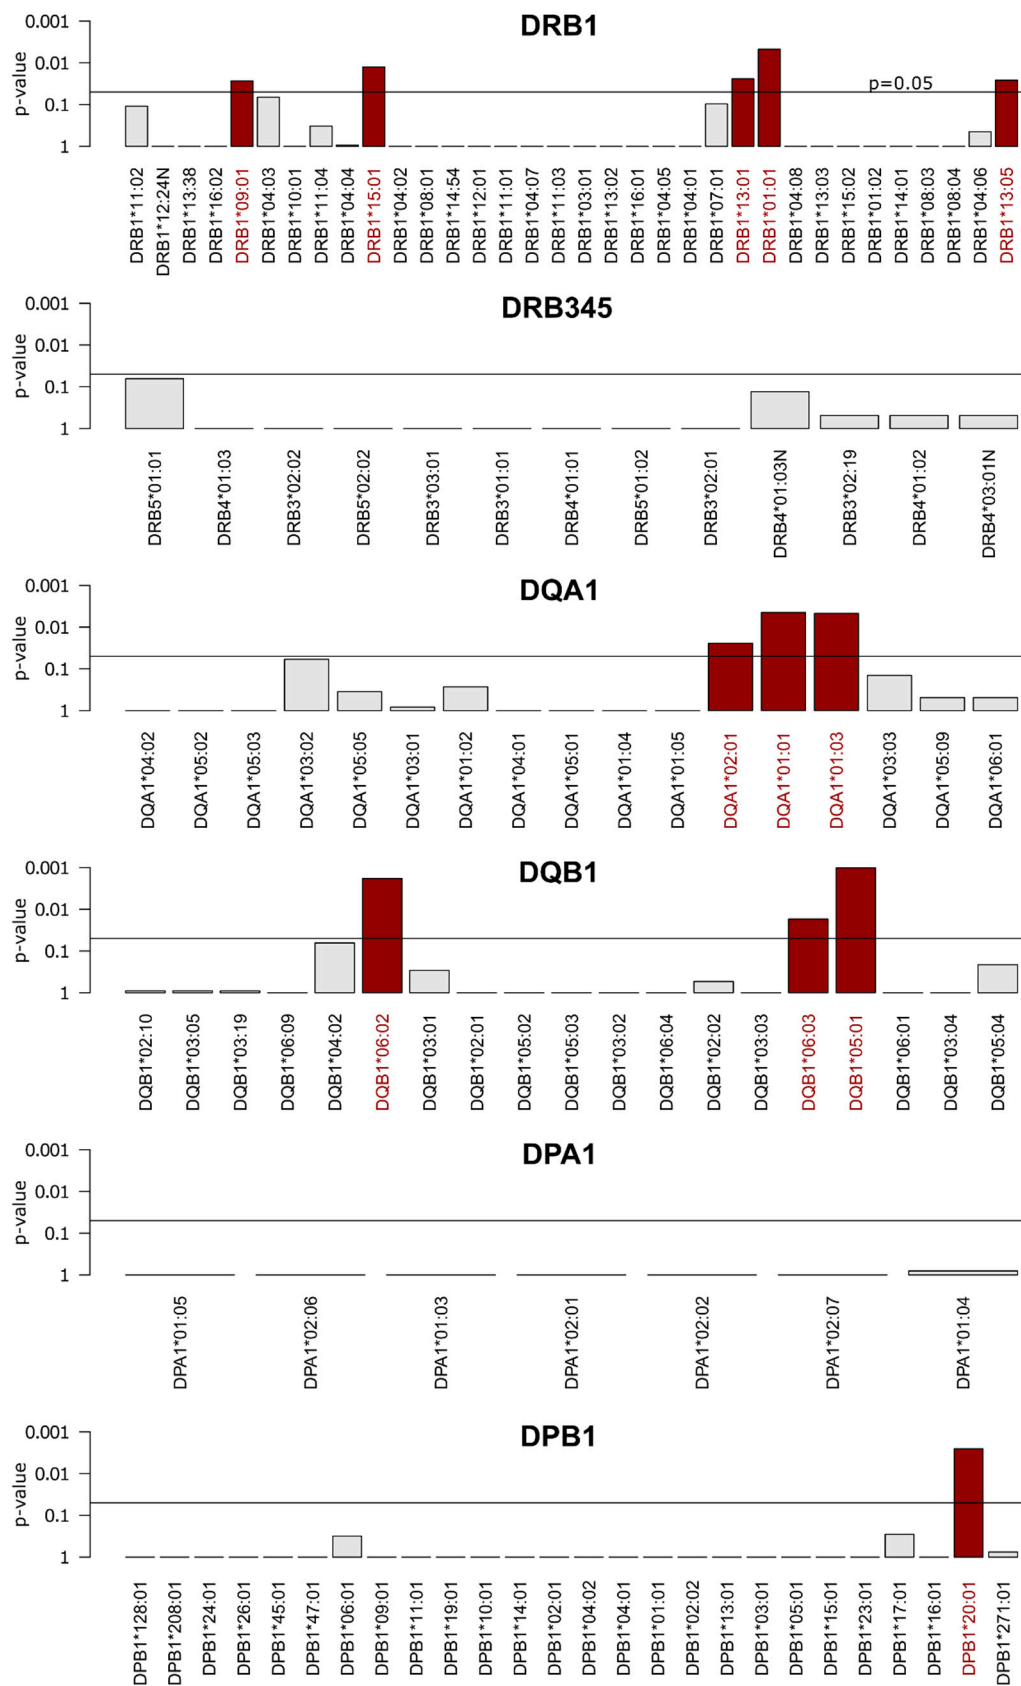



**Figure S4:** Frequencies of blood group and HPA antigens in the Saxonian population

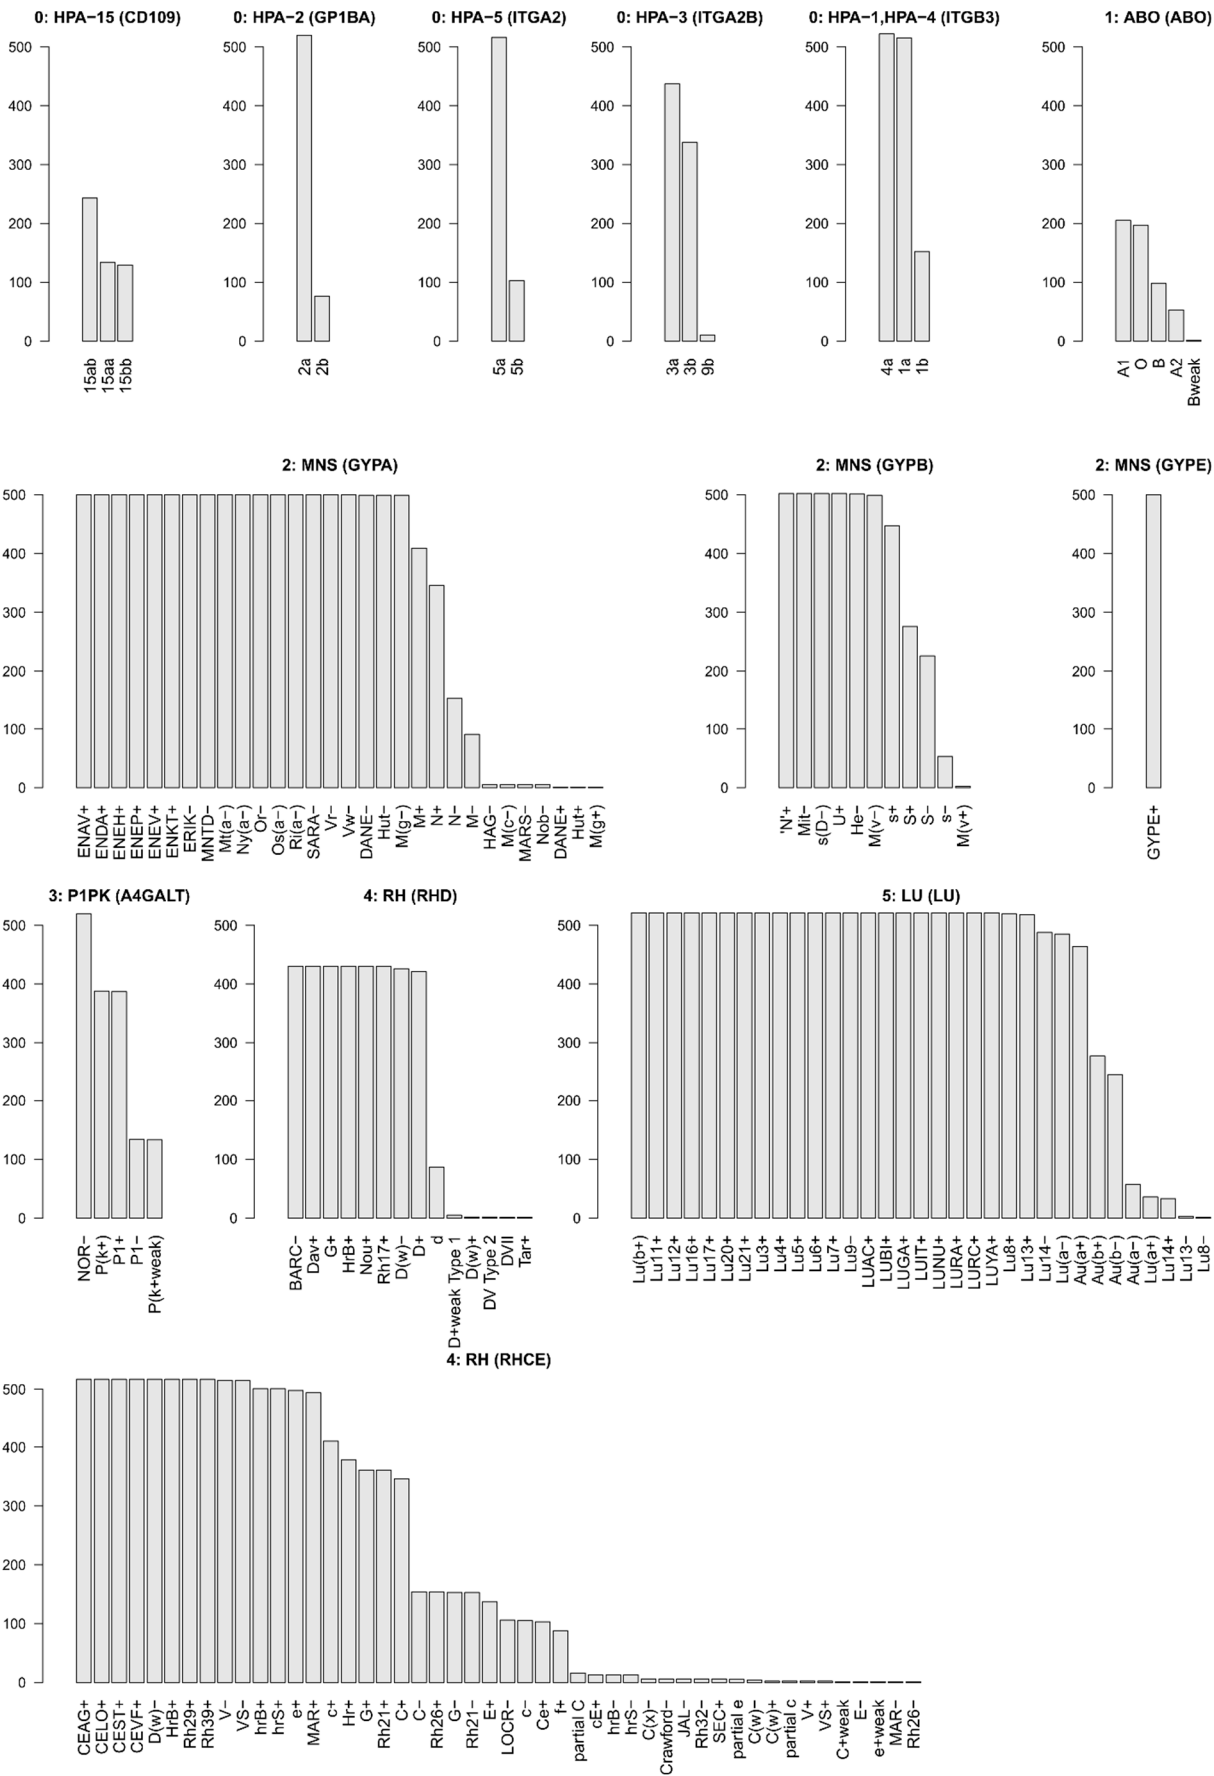

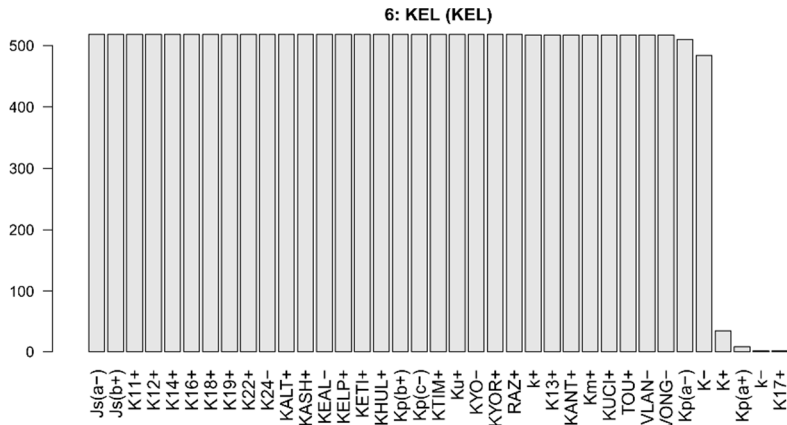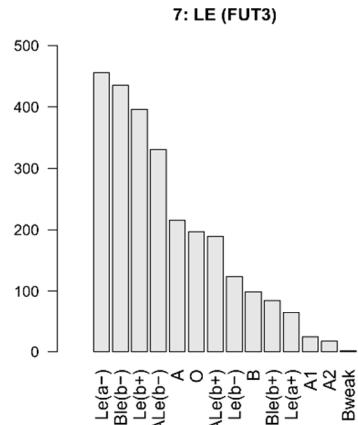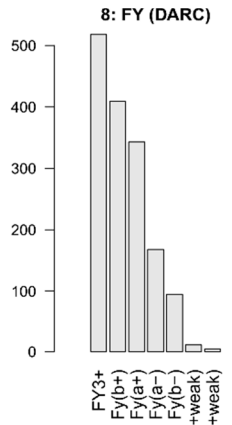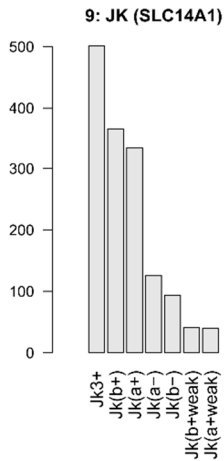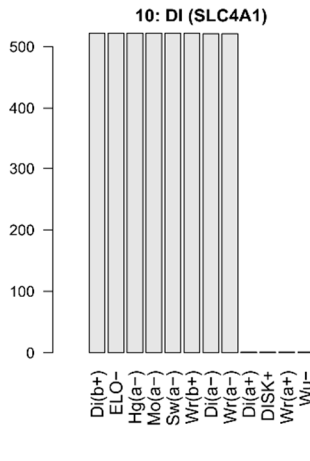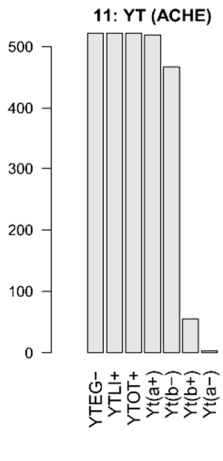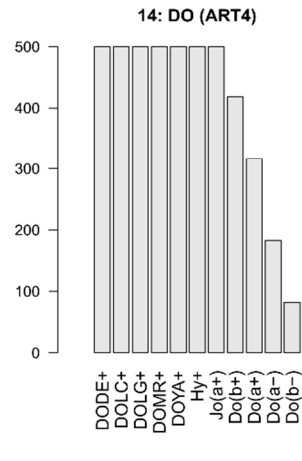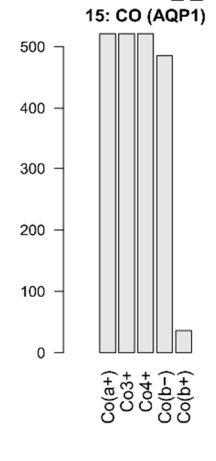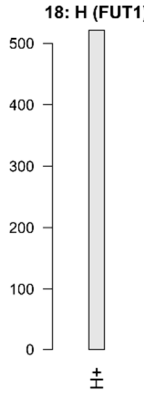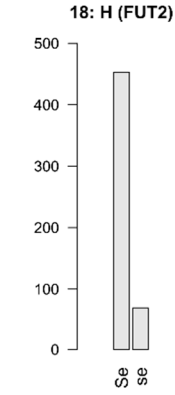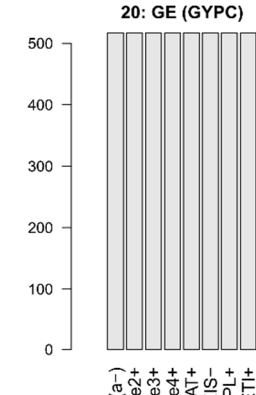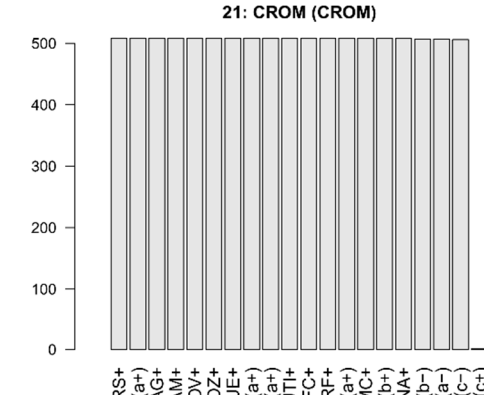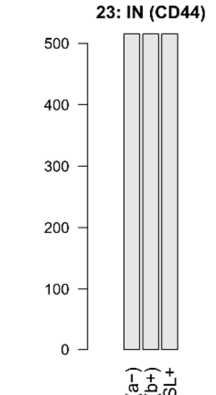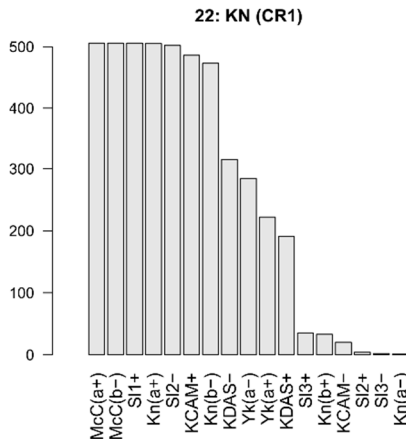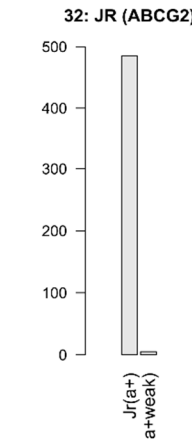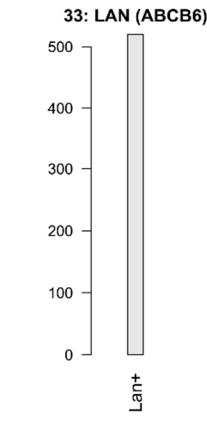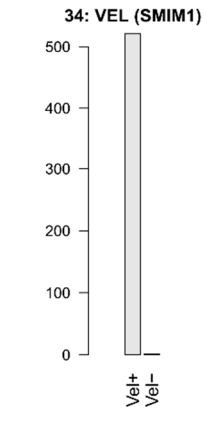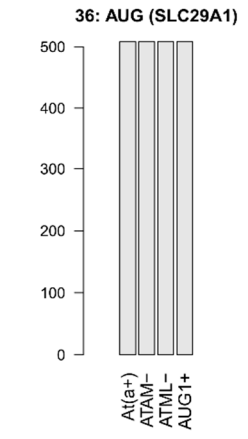

**Figure S5:** t-test of positive PCR proportion against the overall positive rate provides p-values, which were corrected for multiple testing using the Bonferroni method. The horizontal line indicates a corrected p-value of 0.05. Blood groups with corrected p-value<0.05 are highlighted in red

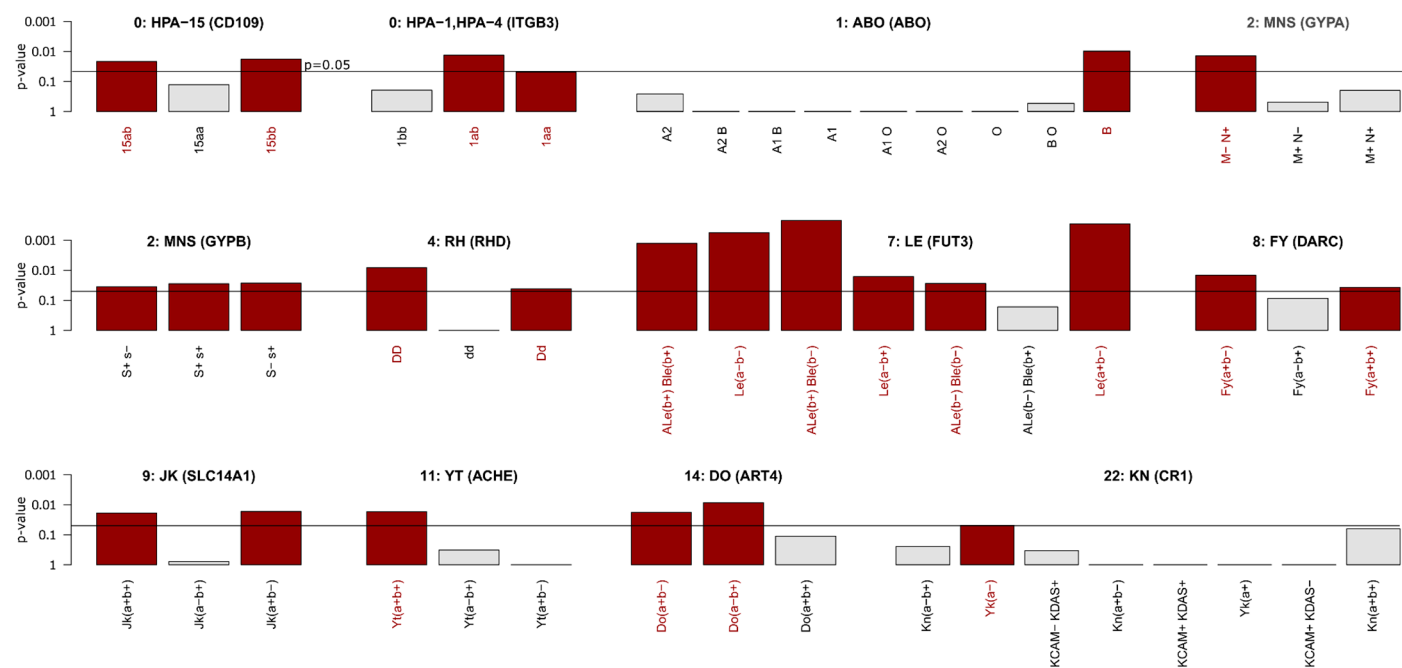

**Figure S6:** Blood groups with no enrichment in both groups (COVID-19 infected and non-infected group): Percent of persons with positive PCR stratified by the alleles. Black and gray bars show the proportion of PCR positive and negative persons in a particular allele, respectively. The overall positive PCR rate of 62% is indicated by the horizontal line. Below: t-statistics of positive PCR proportion against the overall positive rate provides p-values, which were corrected for multiple testing using the Bonferroni method. The horizontal line indicates a corrected p-value of 0.05.

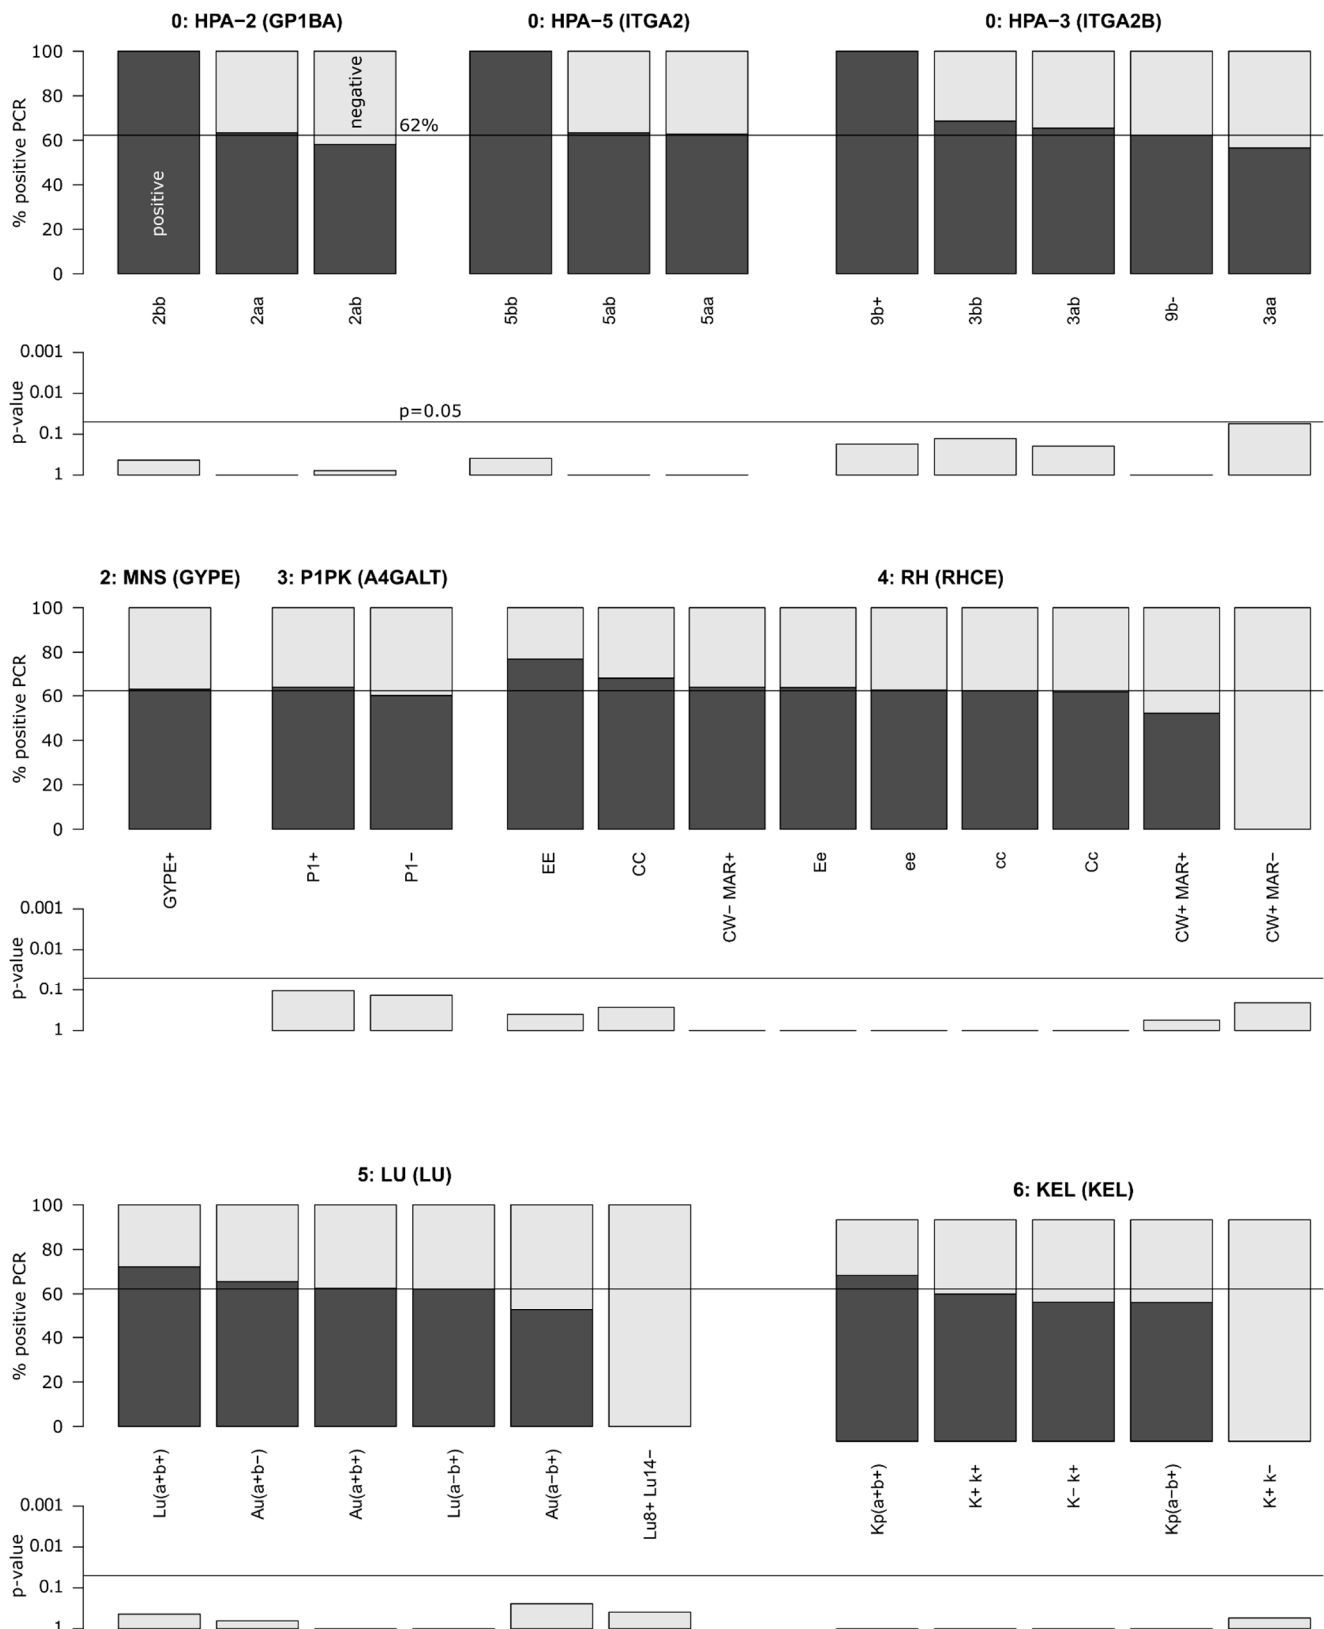

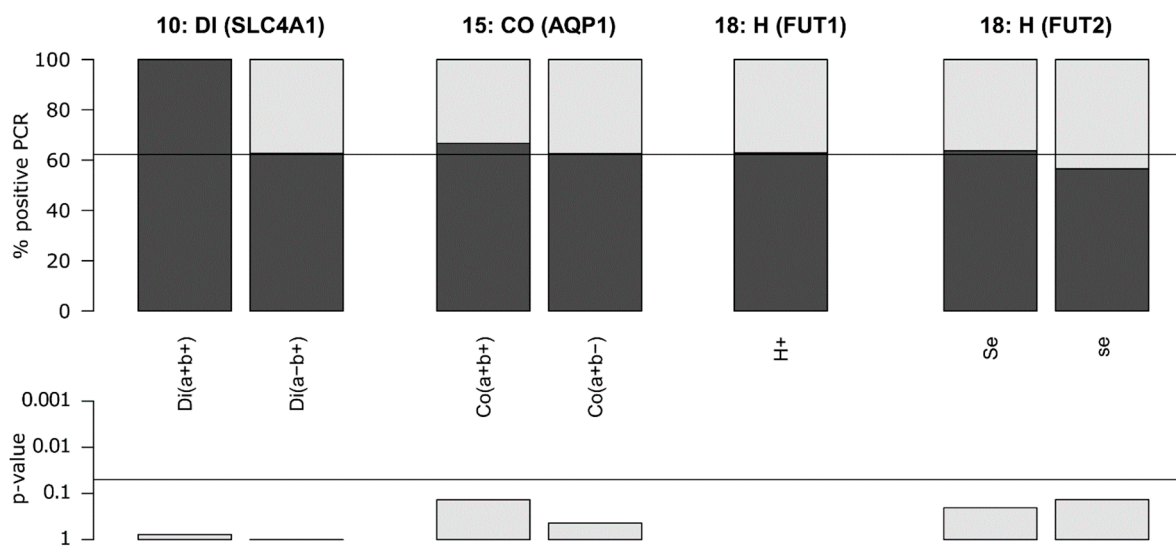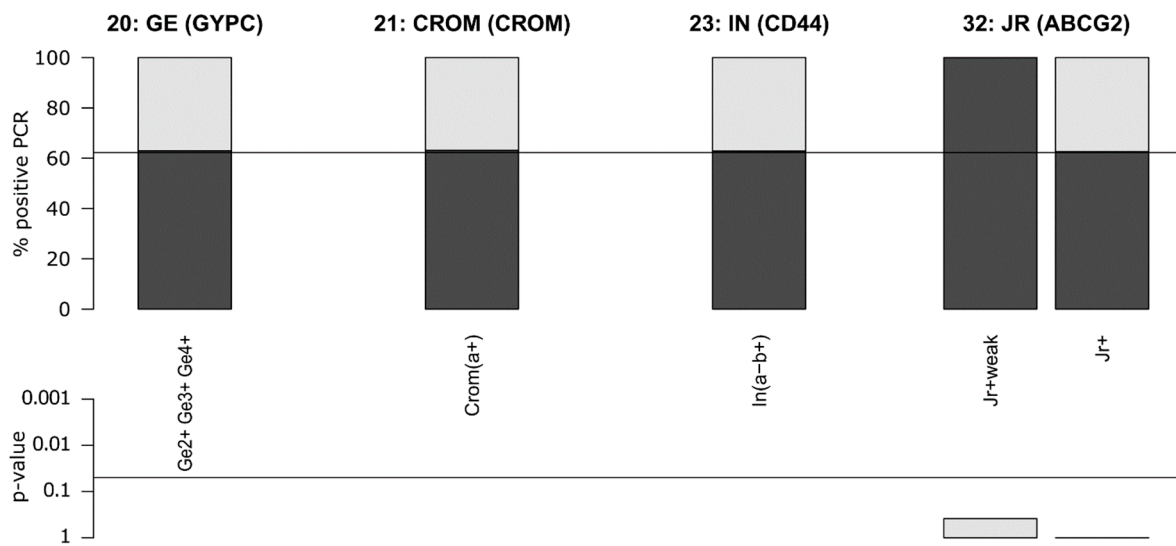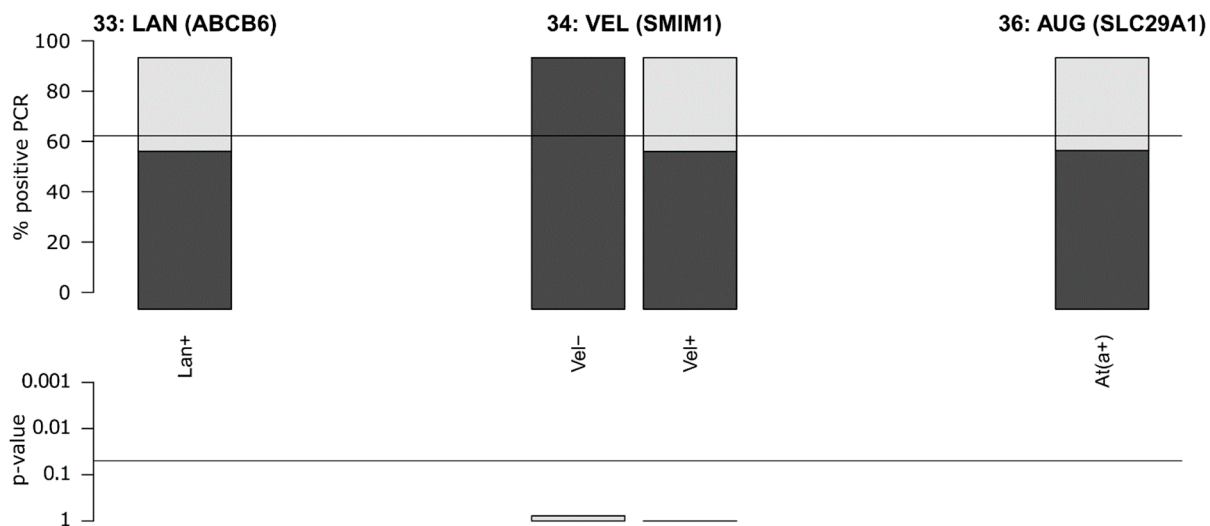

Supplement: s1 [file s1]
